# Supplementary material for: Stable isotope profiles of soil organic carbon in forested and grassland landscapes in the Lake Alaotra basin (Madagascar): insights in past vegetation changes
Source: Copernicus journal article supplement (doi:10.5194/bg-19-3825-2022), 2022-08-23
Supplement: Supplementary file 1 [file bg-19-3825-2022-supplement.zip]

## Supplementary figures

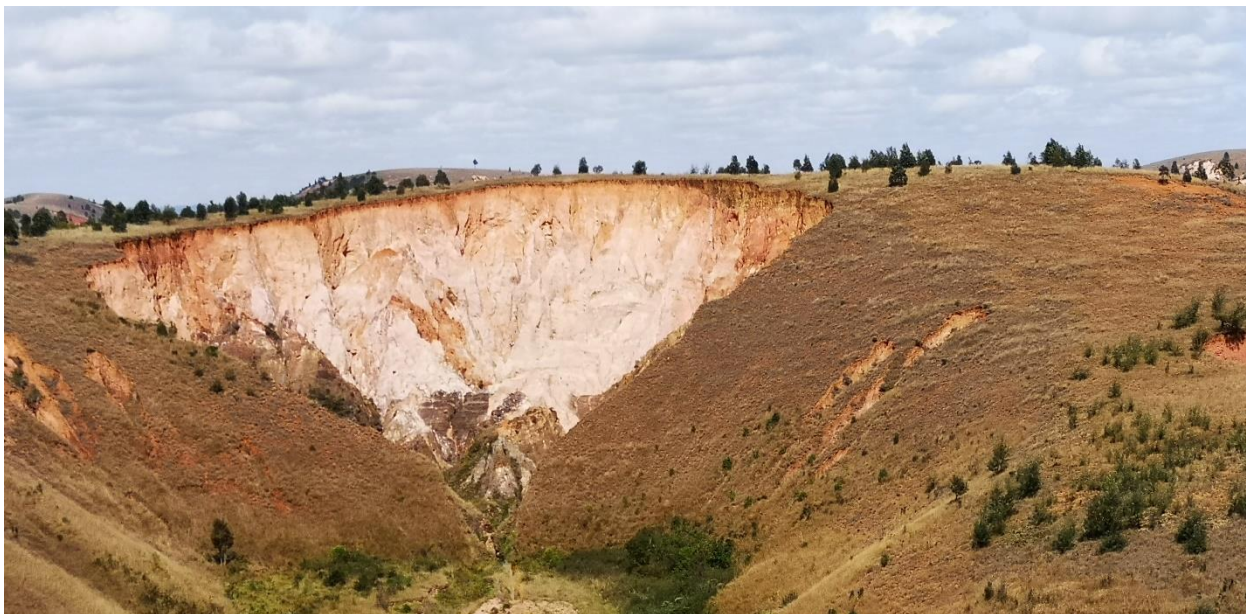

S1: Active inverse teardrop-shaped lavaka on a convex hillslope in the Lake Alaotra basin. The *Eucalyptus sp.* trees act as a  
5 reference for the scale (Photo taken in October 2019 by V.F. Razanamahandry)

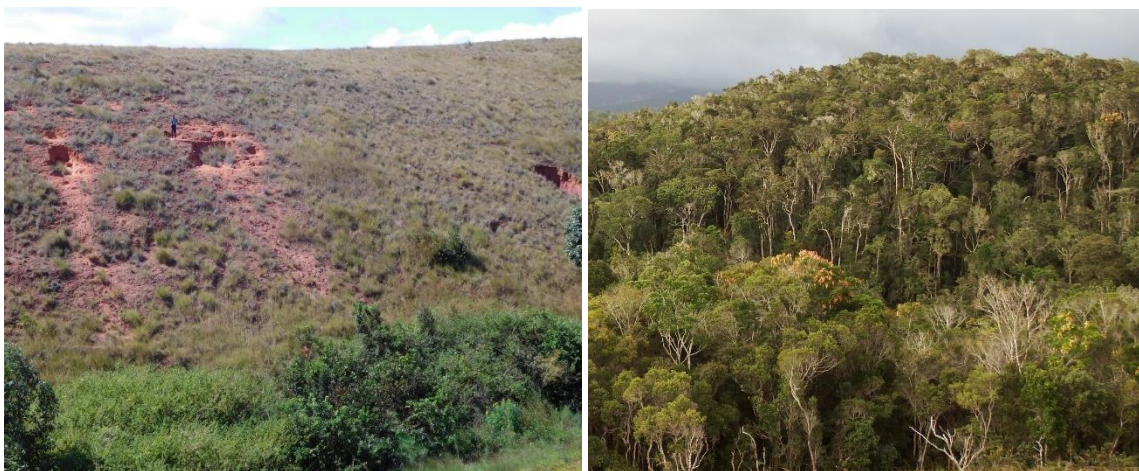

S2: Current vegetation cover of grassland (left) and forest hillslope (right) where soil profiles were sampled. Photo taken in  
October 2019 by V.F. Razanamahandry.

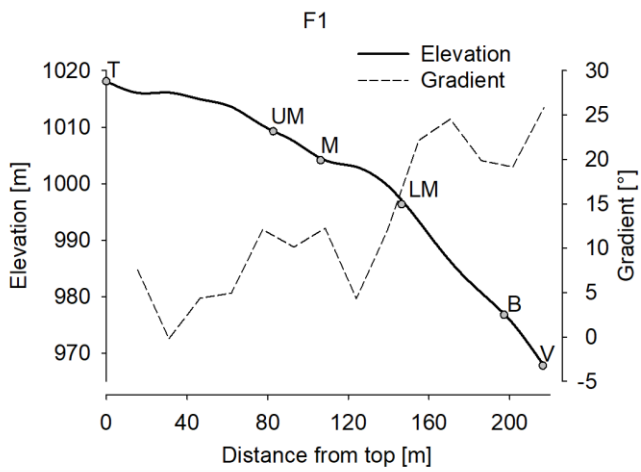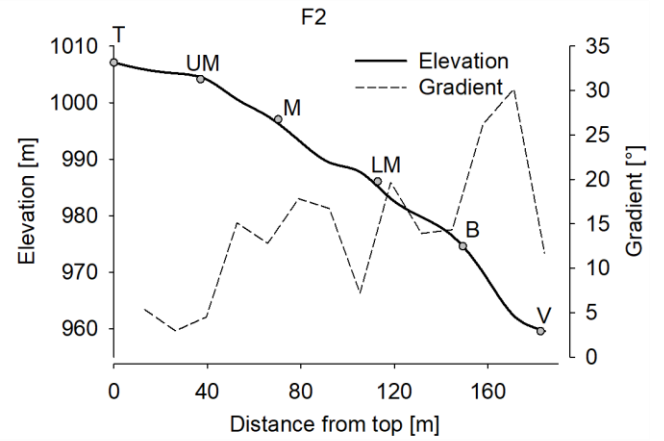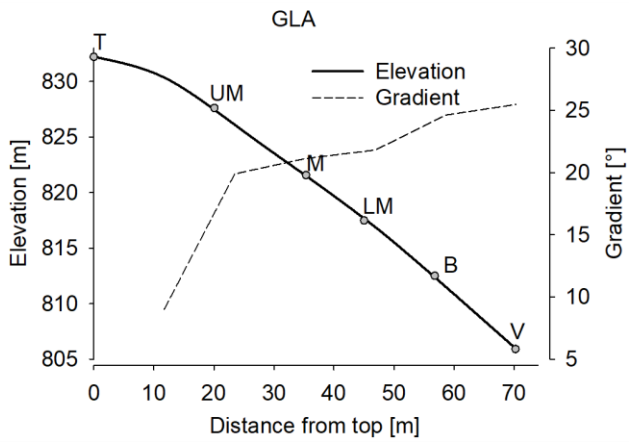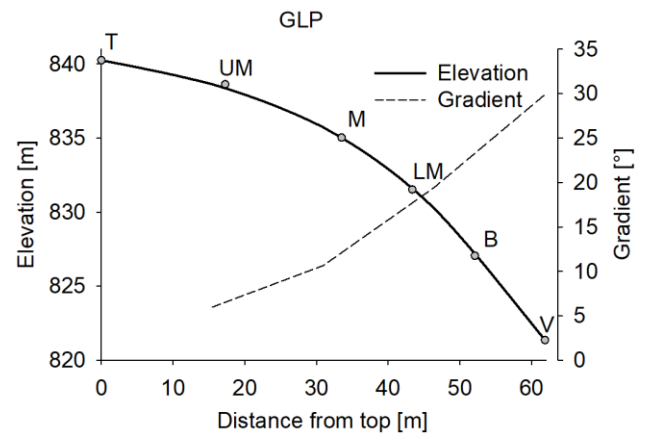

S3: Sampling locations along the hillslope transect plotted together with elevation profiles (left vertical axis) and slope gradient (right vertical axis). T (Top), UM (Upper middle), M (Middle), LM (Lower Middle), B (Bottom) and V (Valley). Elevation data were extracted from the TanDEM-X DEM.

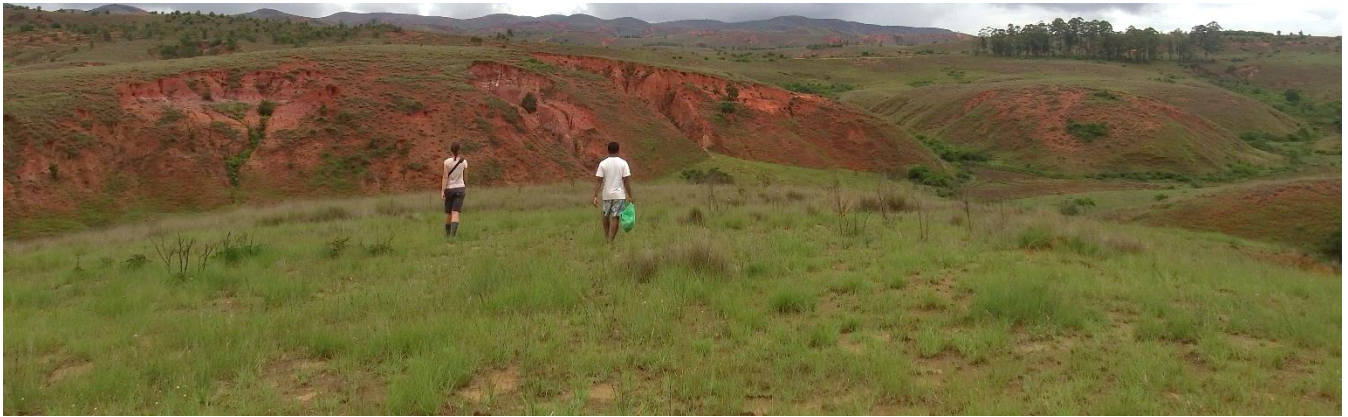

S4: Convex hillslope surrounding lake Alaotra, characterised by a relatively flat top with a slope which curves outwards and steepens toward their basis (Photo taken in January 2019 by V.F. Razanamahandry)

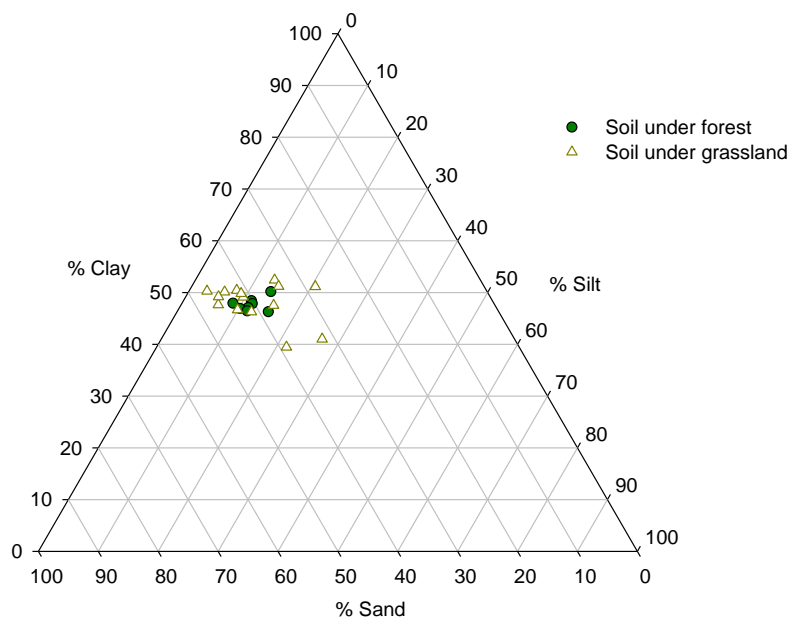

S5: Texture triangle diagram (clay, silt and sand fractions) of soils under forest and grassland.

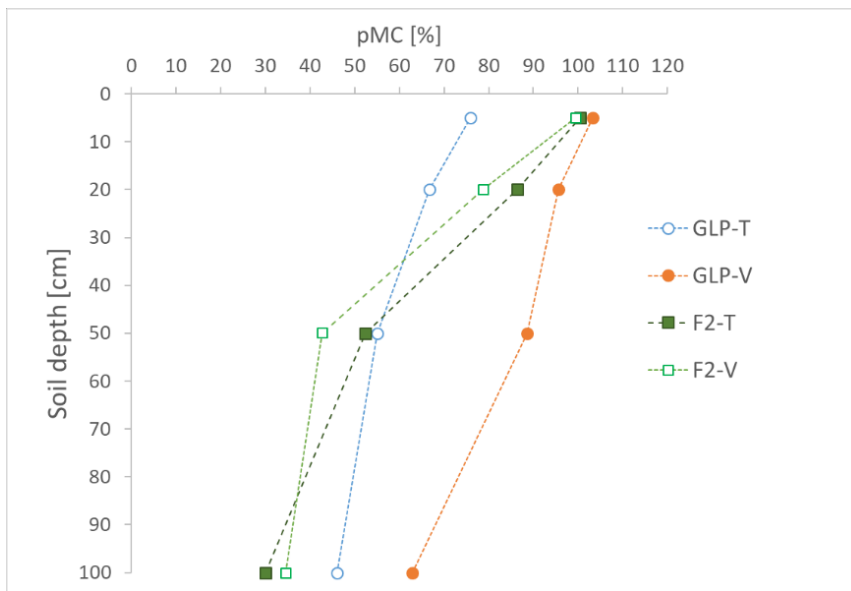

S6: Depth profile of pMC for the GLP-T, GLP-V, F2-T and F2-V profiles.

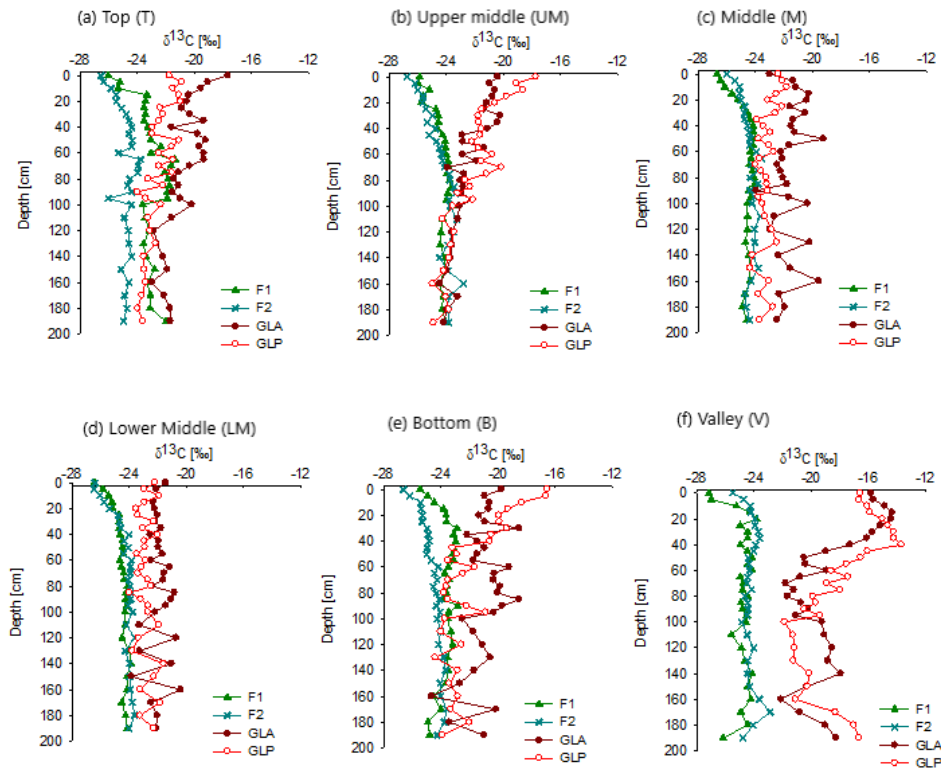

25 S7:  $\delta^{13}\text{C}$  profiles of hillslopes F1, F2, GLA and GLP plotted together for each sampling location: (a) Top, (b) Upper Middle, (c) Middle, (d) Lower Middle, (e) Bottom and (f) Valley.



Supplementary tables

Table 1: P-values from statistical analysis of profiles under forest and grassland with respect to OC%,  $\delta^{13}\text{C}$  and SOC stocks in the upper 50 cm depth.

| Comparison       | OC%   | $\delta^{13}\text{C}$ | SOC stock |
|------------------|-------|-----------------------|-----------|
| GLA-V vs GLP-V   | 0.183 | 0.933                 | 0.270     |
| GLA-B vs GLP-B   | 0.966 | 0.836                 | 0.467     |
| GLA-LM vs GLP-LM | 0.486 | 0.659                 | 0.601     |
| GLA-M vs GLP-M   | 0.071 | 0.186                 | 0.128     |
| GLA-UM vs GLP-UM | 0.204 | 0.931                 | 0.553     |
| GLA-T vs GLP-T   | 0.929 | 0.228                 | 0.837     |
| F1-V vs F2-V     | 0.469 | 0.459                 | 0.6597    |
| F1-B vs F2-B     | 0.128 | 0.063                 | 0.138     |
| F1-LM vs F2-LM   | 0.760 | 0.990                 | 0.833     |
| F1-M vs F2-M     | 0.116 | 0.982                 | 0.154     |
| F1-UM vs F2-UM   | 0.746 | 0.599                 | 0.689     |
| F1-T vs F2-T     | 0.968 | 0.190                 | 0.966     |

30

Table 2: P-values from statistical comparison of valley to each other position ( T, UM, M and B) (i) in the forest (F) and (i) grassland in the upper 0-50 cm depth.

|                      |              | OC%    | $\delta^{13}\text{C}$ | SOC stock |
|----------------------|--------------|--------|-----------------------|-----------|
| Soil under Grassland | G-V vs. G-B  | 0.001  | <0.001                | <0.001    |
|                      | G-V vs. G-LM | <0.001 | <0.001                | <0.001    |
|                      | G-V vs. G-M  | <0.001 | <0.001                | <0.001    |
|                      | G-V vs. G-UM | 0.020  | <0.001                | 0.004     |
|                      | G-V vs. G-T  | 0.013  | <0.001                | 0.013     |
| Soil under Forest    | V-F vs. F-B  | 0.010  | 0.890                 | 0.002     |
|                      | V-F vs. F-LM | 0.002  | 0.066                 | 0.002     |
|                      | V-F vs. F-M  | 0.264  | 0.092                 | 0.166     |
|                      | V-F vs. F-UM | <0.001 | 0.120                 | <0.001    |
|                      | V-F vs. F-T  | 0.704  | 0.991                 | 0.092     |

Table 3: Average values (means  $\pm$  standard deviation) for cumulative SOC stocks (Mg C ha<sup>-1</sup>) of grassland soil profiles and forest profiles for 30 cm, 100 cm and 200 cm soil profiles.

|                 | FOREST SOILS |              | GRASSLAND SOILS |             |
|-----------------|--------------|--------------|-----------------|-------------|
| SOIL DEPTH      | F1           | F2           | GLA             | GLP         |
| <b>0-30 CM</b>  | 70 $\pm$ 30  | 74 $\pm$ 20  | 33 $\pm$ 9      | 30 $\pm$ 11 |
| <b>0-100 CM</b> | 137 $\pm$ 55 | 139 $\pm$ 36 | 76 $\pm$ 23     | 65 $\pm$ 16 |
| <b>0-200 CM</b> | 197 $\pm$ 83 | 171 $\pm$ 38 | 100 $\pm$ 31    | 91 $\pm$ 20 |
