# Supplementary material for: Stable isotope profiles of soil organic carbon in forested and grassland landscapes in the Lake Alaotra basin (Madagascar): insights in past vegetation changes
Source: Copernicus journal article supplement (doi:10.5194/bg-19-3825-2022), 2022-08-23
Supplement: Supplementary file 2 [file bg-19-3825-2022-supplement.zip]

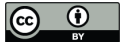

*Supplement of*

**Stable isotope profiles of soil organic carbon in forested and grassland landscapes in the Lake Alaotra basin (Madagascar): insights in past vegetation changes**

**Vao Fenotiana Razanamahandry et al.**

*Correspondence to:* Vao Fenotiana Razanamahandry ([vaofenotiana.razanamahandry@kuleuven.be](mailto:vaofenotiana.razanamahandry@kuleuven.be))

- [bg-19-3825-2022-supplement-title-page.pdf](#)
- Supplementary Material
  - [Supplementary .xlsx](#)
  - [Supplementary figures and tables.pdf](#)

The copyright of individual parts of the supplement might differ from the article licence.
